# Supplementary material for: Acute Exposure to Microplastics Induced Changes in Behavior and Inflammation in Young and Old Mice
Source: MDPI journal article supplement (doi:10.3390/ijms241512308), 2023-08-01
Supplement: s1 [file s1]

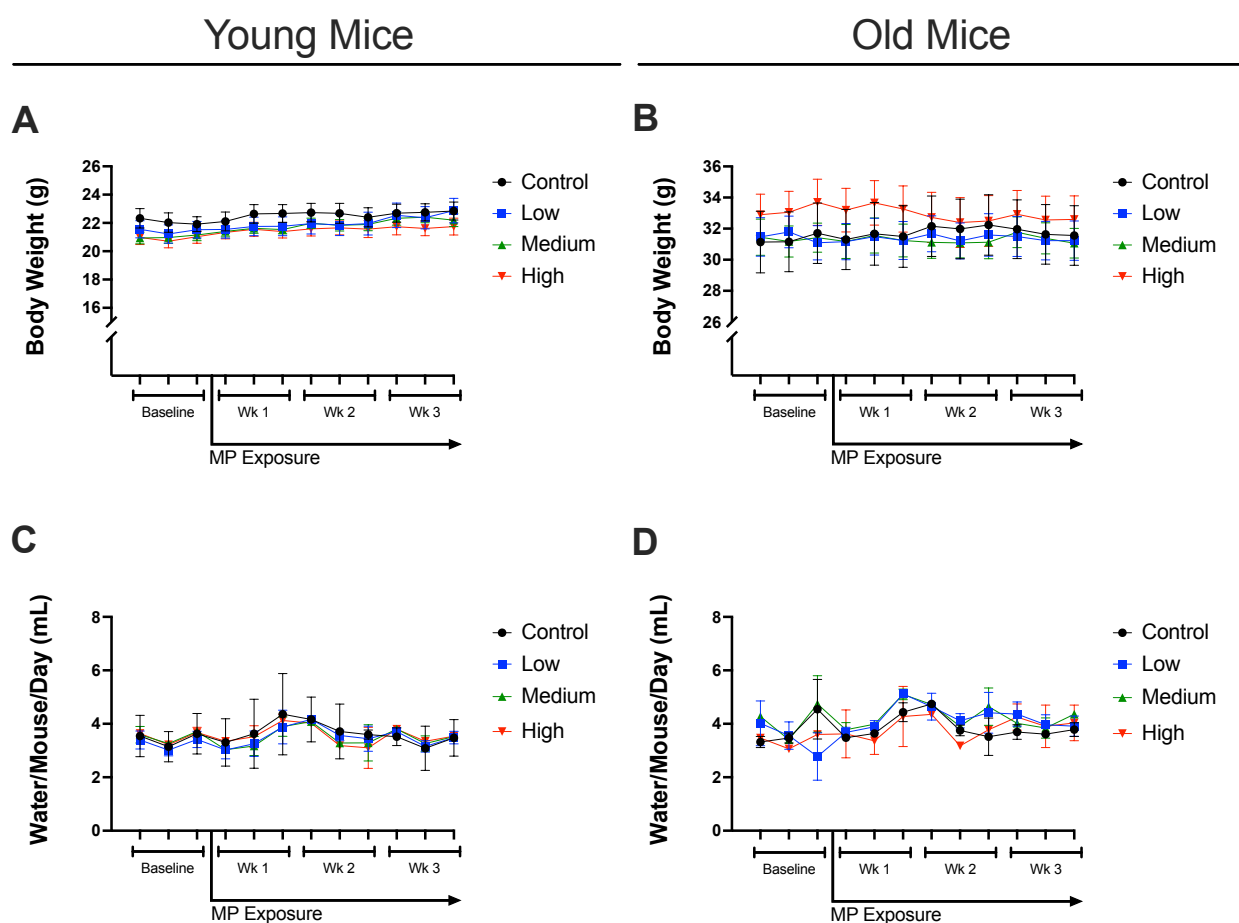

**Supplementary Figure S1. Body weights and water consumption.** (A, B) Gross body weights of 4- and 21-month old female C57BL/6J mice (N=10 per group) exposed to low (blue), medium (green), and high (red) doses of PS-MPs, as compared to control mice (gray). Body weights were measured 3 times per week for one week prior to PS-MPs exposure and then weekly during the 3 week exposure period. No significant differences in body weight were observed for any exposed group, as compared to controls in young (2-way RM ANOVA: low:  $p=0.5795$ , medium:  $p=0.3559$ , high:  $p=0.2168$ ) and old mice (2-way RM ANOVA: low:  $p=0.8599$ , medium:  $p=0.8281$ , high:  $p=0.6612$ ). (C, D) Average water consumption of 4- and 21-month old female C57BL/6J mice (N=10 per group) exposed to low (blue), medium (green), and high (red) doses of PS-MPs, as compared to control mice (gray). Water consumption was measured 3 times per week before and during PS-MPs exposure. Both young and old PS-MPs-exposed mice showed no significant differences in water consumption, as compared to controls (2-way RM ANOVA<sub>YOUNG</sub>: low:  $p=0.8947$ , medium:  $p=0.8614$ , high:  $p=0.9201$ ; 2-way RM ANOVA<sub>OLD</sub>: low:  $p=0.3400$ , medium:  $p=0.2843$ , high:  $p=0.9845$ ).
